# Supplementary material for: Under-5 Mortality and Its Associated Factors in Northern Nigeria: Evidence from 22,455 Singleton Live Births (2013–2018)
Source: MDPI journal article supplement (doi:10.3390/ijerph18189899), 2021-09-20
Supplement: s1 [file s1]

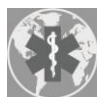

**Table S1.** Hierarchical multivariable model ¥.

| <b>Variable</b>                   | <b>Model 0</b>  | <b>Model 1</b>    | <b>Model 2</b>   | <b>Model 3</b>    | <b>Model 4</b>   |
|-----------------------------------|-----------------|-------------------|------------------|-------------------|------------------|
| <i>Community level factor</i>     | OR(95%CI)       | aOR(95%CI)        | aOR(95%CI)       | aOR(95%CI)        | aOR(95%CI)       |
| <b>Residence type</b>             |                 |                   |                  |                   |                  |
| Urban                             | Ref             | Ref               | Ref              |                   |                  |
| Rural                             | 1.35(1.14—1.60) | 1.32 (1.13—1.53)^ | 1.02(0.88—1.20)  | —                 | —                |
| <b>Geopolitical zone</b>          |                 |                   |                  |                   |                  |
| North Central                     | Ref             | Ref               | Ref              | Ref               | Ref              |
| North East                        | 1.30(1.08—1.55) | 1.25 (1.05—1.48)^ | 1.08(0.90—1.30)  | 1.05 (0.87—1.26)  | 1.07 (0.89—1.29) |
| North West                        | 1.71(1.45—2.01) | 1.66 (1.42—1.94)^ | 1.41(1.18—1.68)^ | 1.34 (1.13—1.59)^ | 1.38(1.16—1.65)^ |
| <i>Socioeconomic level factor</i> |                 |                   |                  |                   |                  |
| <b>Household wealth index</b>     |                 |                   |                  |                   |                  |
| Rich                              | Ref             |                   | Ref              | Ref               | Ref              |
| Middle                            | 1.73(1.22—2.45) | —                 | 1.41(0.99—1.98)  | 1.38 (0.98—2.02)  | 1.44(1.01—2.07)^ |
| Poor                              | 2.37(1.71—3.30) | —                 | 1.67(1.18—2.36)^ | 1.65(1.14—2.39)^  | 1.68(1.17—2.42)^ |
| <b>Mother's education</b>         |                 |                   |                  |                   |                  |
| Secondary or higher               | Ref             |                   | Ref              | Ref               | Ref              |
| Primary                           | 1.52(1.24—1.86) | —                 | 1.21(0.95—1.55)  | 1.28 (1.02—1.61)^ | 1.29(1.03—1.62)^ |
| No education                      | 1.92(1.61—2.30) | —                 | 1.29(1.01—1.70)^ | 1.38 (1.10—1.73)^ | 1.35(1.07—1.70)^ |
| <b>Mother's literacy level</b>    |                 |                   |                  |                   |                  |
| Able to read                      | Ref             |                   | Ref              |                   |                  |

|                                                         |                 |   |                  |                   |                  |
|---------------------------------------------------------|-----------------|---|------------------|-------------------|------------------|
| Cannot read                                             | 1.71(1.47—1.99) | — | 1.06(0.86—1.30)  | —                 | —                |
| <b>Father's education</b>                               |                 |   |                  |                   |                  |
| Secondary or higher                                     | Ref             |   | Ref              | Ref               | Ref              |
| Primary                                                 | 1.48(1.23—1.78) | — | 1.22(1.01—1.48)^ | 1.21 (1.00—1.47)  | 1.21(1.01—1.46)^ |
| No education                                            | 1.73(1.51—1.99) | — | 1.37(1.17—1.61)^ | 1.31 (1.12—1.53)^ | 1.32(1.13—1.54)^ |
| <b>Father's occupation</b>                              |                 |   |                  |                   |                  |
| Not working                                             | Ref             |   | Ref              | Ref               | Ref              |
| Non-agricultural work                                   | 1.37(0.99—1.87) | — | 1.62(1.20—2.21)^ | 1.57 (1.15—2.15)^ | 1.58(1.17—2.15)^ |
| Agricultural work                                       | 1.51(1.11—2.06) | — | 1.41(1.04—1.91)^ | 1.42 (1.04—1.94)^ | 1.44(1.06—1.96)^ |
| <b>Number of women in household</b>                     |                 |   |                  |                   |                  |
| One woman                                               | Ref             |   | Ref              |                   |                  |
| At least 2 women                                        | 1.17(1.04—1.31) | — | 1.08(0.96—1.21)  | —                 | —                |
| <i>Individual related factor</i>                        |                 |   |                  |                   |                  |
| <b>Mother's age</b>                                     |                 |   |                  |                   |                  |
| < 20                                                    | 1.60(1.24—2.05) | — | —                | 1.17 (0.87—1.57)  | —                |
| 20—29                                                   | 1.08(0.97—1.21) | — | —                | 1.00 (0.87—1.15)  | —                |
| 30—39                                                   | Ref             |   |                  | Ref               |                  |
| 40—49                                                   | 1.21(1.02—1.42) | — | —                | 1.15 (0.97—1.36)  | —                |
| <b>Mother's body mass index kg/m<sup>2</sup> (MBMI)</b> |                 |   |                  |                   |                  |
| Normal (18.5≤MBMI<24.9)                                 | Ref             |   |                  | Ref               |                  |
| Underweight (MBMI < 18.5)                               | 1.06(0.94—1.19) | — | —                | 1.04 (0.93—1.17)  | —                |
| Overweight (25≤MBMI<29.9)                               | 1.07(0.88—1.29) | — | —                | 1.21 (0.99—1.47)  | —                |
| Obese (MBMI≥30)                                         | 0.85(0.53—1.37) | — | —                | 1.35 (0.83—2.19)  | —                |
| <b>Wanted pregnancy</b>                                 |                 |   |                  |                   |                  |
| Wanted then                                             | Ref             |   |                  | Ref               |                  |
| Wanted later                                            | 0.83(0.64—1.09) | — | —                | 0.93 (0.71—1.23)  | —                |
| Wanted no more                                          | 0.71(0.44—1.14) | — | —                | 0.771 (0.48—1.25) | —                |
| <b>Mother's perceived baby size</b>                     |                 |   |                  |                   |                  |

|                                     |                 |   |   |                   |                  |
|-------------------------------------|-----------------|---|---|-------------------|------------------|
| Average or larger                   | Ref             |   |   | Ref               | Ref              |
| Small or very small                 | 1.44(1.22—1.69) | — | — | 1.37 (1.19—1.58)^ | 1.34(1.16—1.55)^ |
| <b>Sex</b>                          |                 |   |   |                   |                  |
| Female                              | Ref             |   |   | Ref               |                  |
| Male                                | 1.07(0.95—1.22) | — | — | 1.08 (0.94—1.23)  | —                |
| <b>Birth order/ birth interval</b>  |                 |   |   |                   |                  |
| First                               | 1.63(1.39—1.91) | — | — | 1.57 (1.33—1.85)^ | 1.61(1.38—1.88)^ |
| 2nd or 3rd rank, interval ≤ 2 yr    | 1.82(1.45—2.30) | — | — | 1.75 (1.39—2.19)^ | 1.79(1.43—2.23)^ |
| 2nd or 3rd rank, interval > 2 yr    | Ref             |   |   | Ref               | Ref              |
| 4th or higher rank, interval ≤ 2 yr | 1.17(1.01—1.36) | — | — | 1.03 (0.86—1.24)  | 1.07 (0.92—1.24) |
| 4th or higher rank, interval > 2 yr | 1.92(1.63—2.27) | — | — | 1.65 (1.35—2.01)^ | 1.68(1.42—1.98)^ |
| <i>Health related factor</i>        |                 |   |   |                   |                  |
| <b>Contraceptive use</b>            |                 |   |   |                   |                  |
| Yes                                 | Ref             |   |   |                   | Ref              |
| No                                  | 1.87(1.53—2.29) | — | — | —                 | 1.43(1.14—1.78)^ |
| <b>Place of birth</b>               |                 |   |   |                   |                  |
| Home                                | 1.36(1.17—1.58) | — | — | —                 | 0.85 (0.60—1.20) |
| Health facility                     | Ref             |   |   |                   | Ref              |
| <b>Mode of delivery</b>             |                 |   |   |                   |                  |
| Non-caesarean                       | Ref             |   |   |                   | Ref              |
| Caesarean                           | 1.58(0.93—2.69) | — | — | —                 | 2.52(1.47—4.32)^ |
| <b>Delivery assistance</b>          |                 |   |   |                   |                  |
| Health professional                 | Ref             |   |   |                   | Ref              |
| Non-health professional             | 1.40(1.21—1.61) | — | — | —                 | 1.06 (0.76—1.48) |

Notes: ^, significant variable (s) added to the next model; Model 0 – Unadjusted for all the independent variables; Model 1- Community level factors (residence type & region); Model 2 - significant variable(s) in Model 1 added to socioeconomic variables (household wealth status, maternal education, paternal education, mother literacy level, father's occupation, number of women in the household); Model 3 – significant variable(s) in Model 2 added to individual level factor (mother's age, MBMI, wanted pregnancy at the time pregnant, perceived baby size by their mothers, child sex, & birth order/interval); Model 4 – significant variables in Model 3 added to health related factor (contraceptive use, delivery assistant, mode of delivery & place of delivery). yr, years; aOR (95%CI): adjusted Odds ratio with corresponding 95% confidence interval, OR: unadjusted Odds ratio; Ref, reference category; §, Caesarean section is a combination of elective and emergency procedures; ¥, 1,113 missing values were excluded from the analyses. .
